# Supplementary material for: A nanofluidic osmotic power generator demonstrated in polymer gel electrolytes with substantially enhanced performance
Source: Royal Society of Chemistry journal article supplement (doi:10.1039/c9ta10028h), 2019-01-01
Supplement: c9ta10028h1.pdf [file c9ta10028h1.pdf]

**Electronic Supplementary Information (ESI) for**

**A nanofluidic osmotic power generator demonstrated in polymer gel electrolytes with  
substantially enhanced performance**

Li-Hsien Yeh,<sup>1,\*</sup> Zih-Ying Huang,<sup>1,2</sup> Yi Cheng Liu,<sup>3</sup> Ming-Jay Deng,<sup>4,5</sup> Tzung-Han Chou,<sup>2</sup>

Hsing-Chiao Ou Yang,<sup>1</sup> Tansir Ahamad,<sup>6</sup> Saad M. Alshehri,<sup>6</sup> Kevin C. W. Wu<sup>3</sup>

<sup>1</sup>Department of Chemical Engineering, National Taiwan University of Science and  
Technology, Taipei 10607, Taiwan

<sup>2</sup>Department of Chemical and Materials Engineering, National Yunlin University of Science  
and Technology, Yunlin 64002, Taiwan

<sup>3</sup>Department of Chemical Engineering, National Taiwan University, Taipei 10617, Taiwan

<sup>4</sup>Bachelor Program in Interdisciplinary Studies, National Yunlin University of Science and  
Technology, Yunlin 64002, Taiwan

<sup>5</sup>Department of Applied Chemistry, Providence University, Taichung 43301, Taiwan

<sup>6</sup>Department of Chemistry, College of Science, King Saud University, P.O. Box 2455,  
Riyadh 11451, Saudi Arabia

---

\* Corresponding Author: [lhyeh@mail.ntust.edu.tw](mailto:lhyeh@mail.ntust.edu.tw), Tel. +886-2-27376942

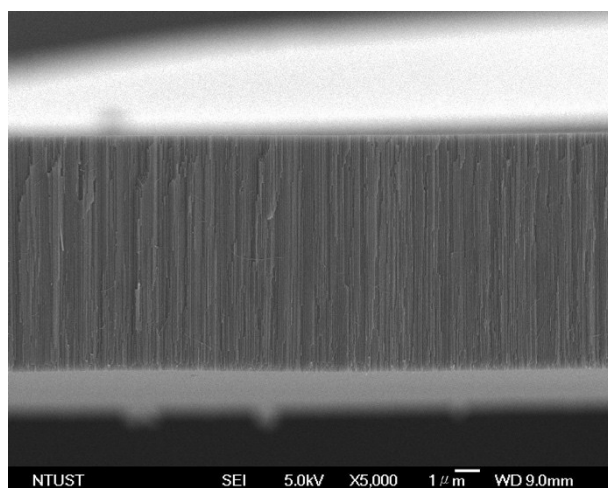

**Figure S1.** Cross-section view SEM image of the prepared ANM, revealing highly ordered structure of straight channels.

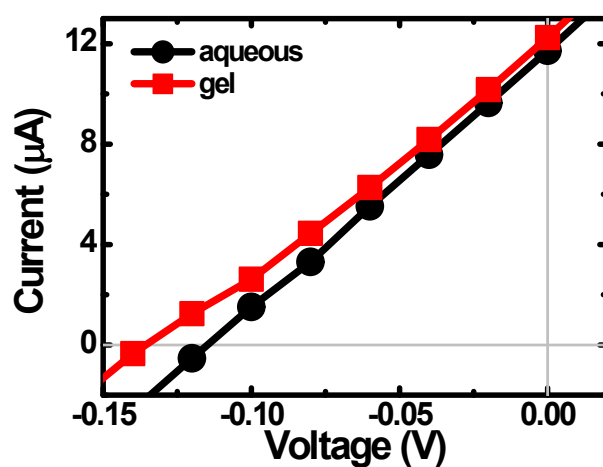

**Figure S2.** I-V curves of the ANM in aqueous and PVA gel electrolytes under 500 mM/0.1 mM KCl gradient.

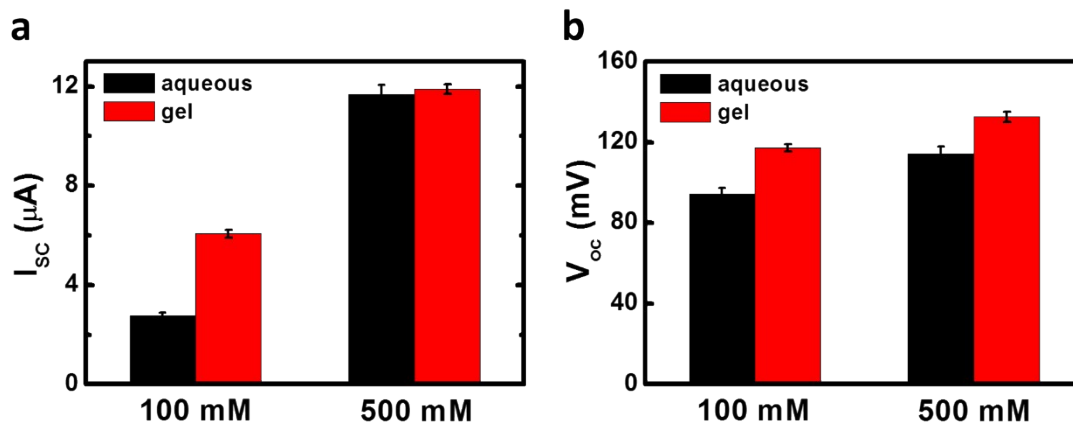

**Figure S3.** (a) Short-circuit current  $I_{sc}$  and (b) open-circuit voltage  $V_{oc}$  generated by the ANM placed in contact with aqueous and PVA gel electrolytes as a function of KCl gradient. A lower concentration of KCl was kept at 0.1 mM as reported in Fig. 2a of the main text.

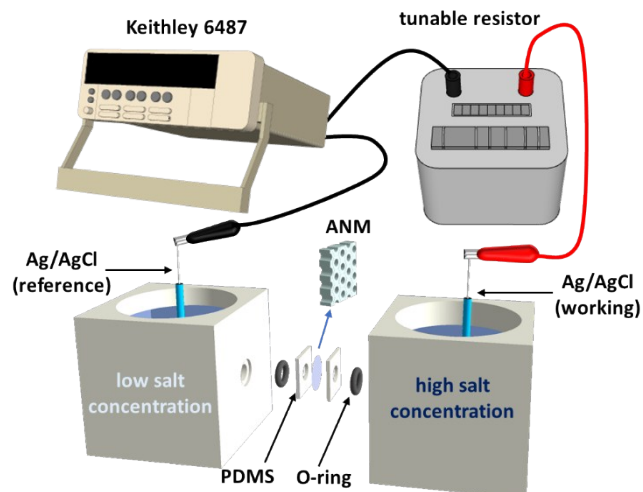

**Figure S4.** Schematic illustration of the experimental set-up for the osmotic power generation.

The power generated can be transferred to the external circuit containing a tunable resistor.

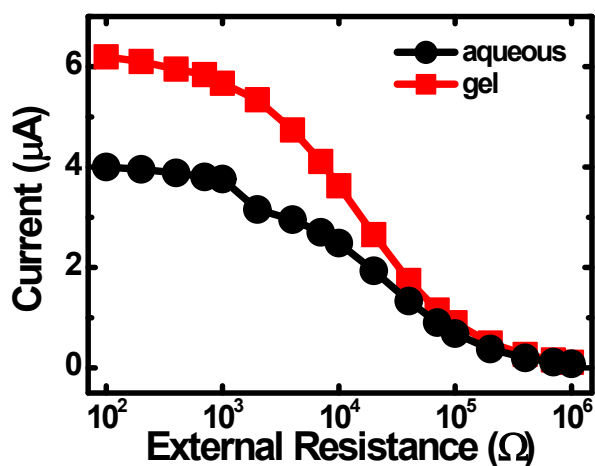

**Figure S5.** Comparison of the current generation in aqueous solution with that in PVA gel solution in a 100 mM/0.1 mM KCl gradient. This is the same ANM as shown in Fig. 2 of the main text.

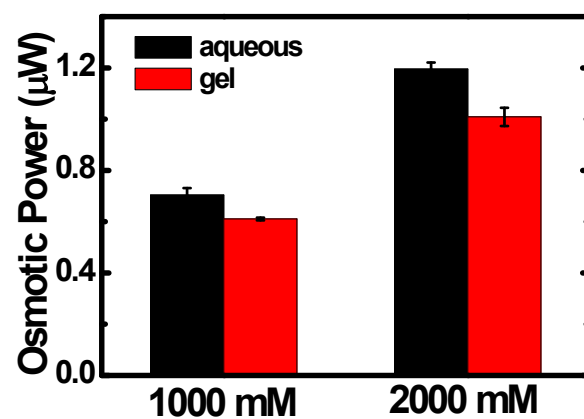

**Figure S6.** Osmotic power generation in aqueous and PVA gel electrolytes as a function of KCl gradient. Here a lower concentration of KCl was kept at 0.1 mM as reported in Fig. 2c of the main text.

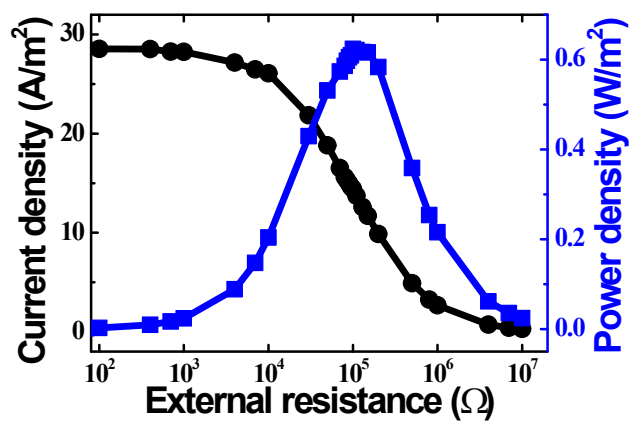

**Figure S7.** Osmotic current density and power density generated in the PVA gel subjected to a 100 mM/0.1 mM KCl gradient. The maximum power density generated is  $\sim 0.624$  W/m<sup>2</sup>. The result was extracted from another independently prepared ANM.

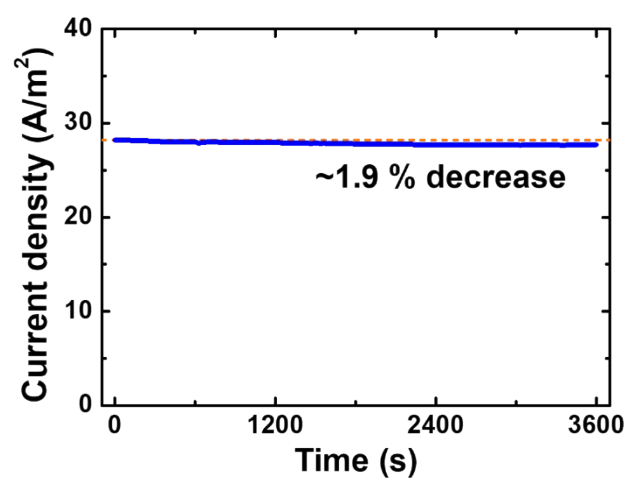

**Figure S8.** Current density-time curve of the PVA-gel electrolyte system in a 100 mM/0.1 mM

KCl gradient, exhibiting ~1.9 % decrease in an hour for the case of no electrolyte replenishing.

## Numerical Simulation

In the model, we considered the two nanochannel systems (Fig. 4), connected by two large, identical reservoirs. The energy harvesting from a salinity gradient for the systems considered in the main text can be described by the modified Poisson and Nernst-Planck equations:<sup>1</sup>

$$-\nabla^2 \phi = \frac{\sum_{i=1}^2 F z_i C_i + \Phi \rho_{PE}}{\epsilon_f}, \quad (\text{S1})$$

$$\nabla \cdot \mathbf{J}_i = \nabla \cdot \left[ -D_i \nabla C_i - \left( \frac{F z_i C_i D_i}{RT} \right) \nabla \phi \right] = 0, \quad (\text{S2})$$

In the above,  $\phi$  is the electric potential;  $\epsilon_f$  is the fluid permittivity;  $F$ ,  $R$ , and  $T$  are the Faraday constant, gas constant, and absolute temperature, respectively.  $C_i$ ,  $D_i$ ,  $\mathbf{J}_i$ , and  $z_i$  are the concentration, diffusivity, flux, and valence of the  $i^{\text{th}}$  ionic species, respectively ( $i = 1$  for  $\text{K}^+$  cations and  $i = 2$  for  $\text{Cl}^-$ ). The charged PVA in the channel is modeled as a polyelectrolyte (PE) layer, which is ion-penetrable and homogeneously structured with a fixed space charge density of  $\rho_{PE}$ . In the model of the solid-nanochannel system (Fig. 4a in the main text), we let  $\Phi = 0$ . Otherwise, in the model of the PE-filled nanochannel (Fig. 4b), we let  $\Phi = 1$  ( $\Phi = 0$ ) for the region inside (outside) the PE layer. The radial-axial domain ( $r, z$ ) is considered to simulate the cylinder-shaped structure of the ANM used. The detailed boundary conditions required can be found in our previous publications.<sup>1, 2</sup>

The current-voltage curves for the systems considered in Fig. 4 are solved numerically based on the above-mentioned model performed by COMSOL Multiphysics 4.3a operated on a high-



performance cluster. The ionic current through the channel can be calculated by

$$\int_S \left( \sum_{i=1}^2 Fz_i \mathbf{J}_i \right) \cdot \mathbf{n} dS, \quad (\text{S3})$$

where  $\mathbf{n}$  is unit normal vector and  $S$  denotes either end of two reservoirs.

## References

1. C. Y. Lin, C. Combs, Y. S. Su, L. H. Yeh and Z. S. Siwy, *J. Am. Chem. Soc.*, 2019, **141**, 3691-3698.
2. L. H. Yeh, M. Zhang, N. Hu, S. W. Joo, S. Qian and J. P. Hsu, *Nanoscale*, 2012, **4**, 5169-5177.
